# Supplementary material for: How to Use a Chemotherapeutic Agent When Resistance to It Threatens the Patient
Source: PubMed Central journal article supplement (PMC5300106; doi:10.1371/journal.pbio.2001110), 2017-02-09

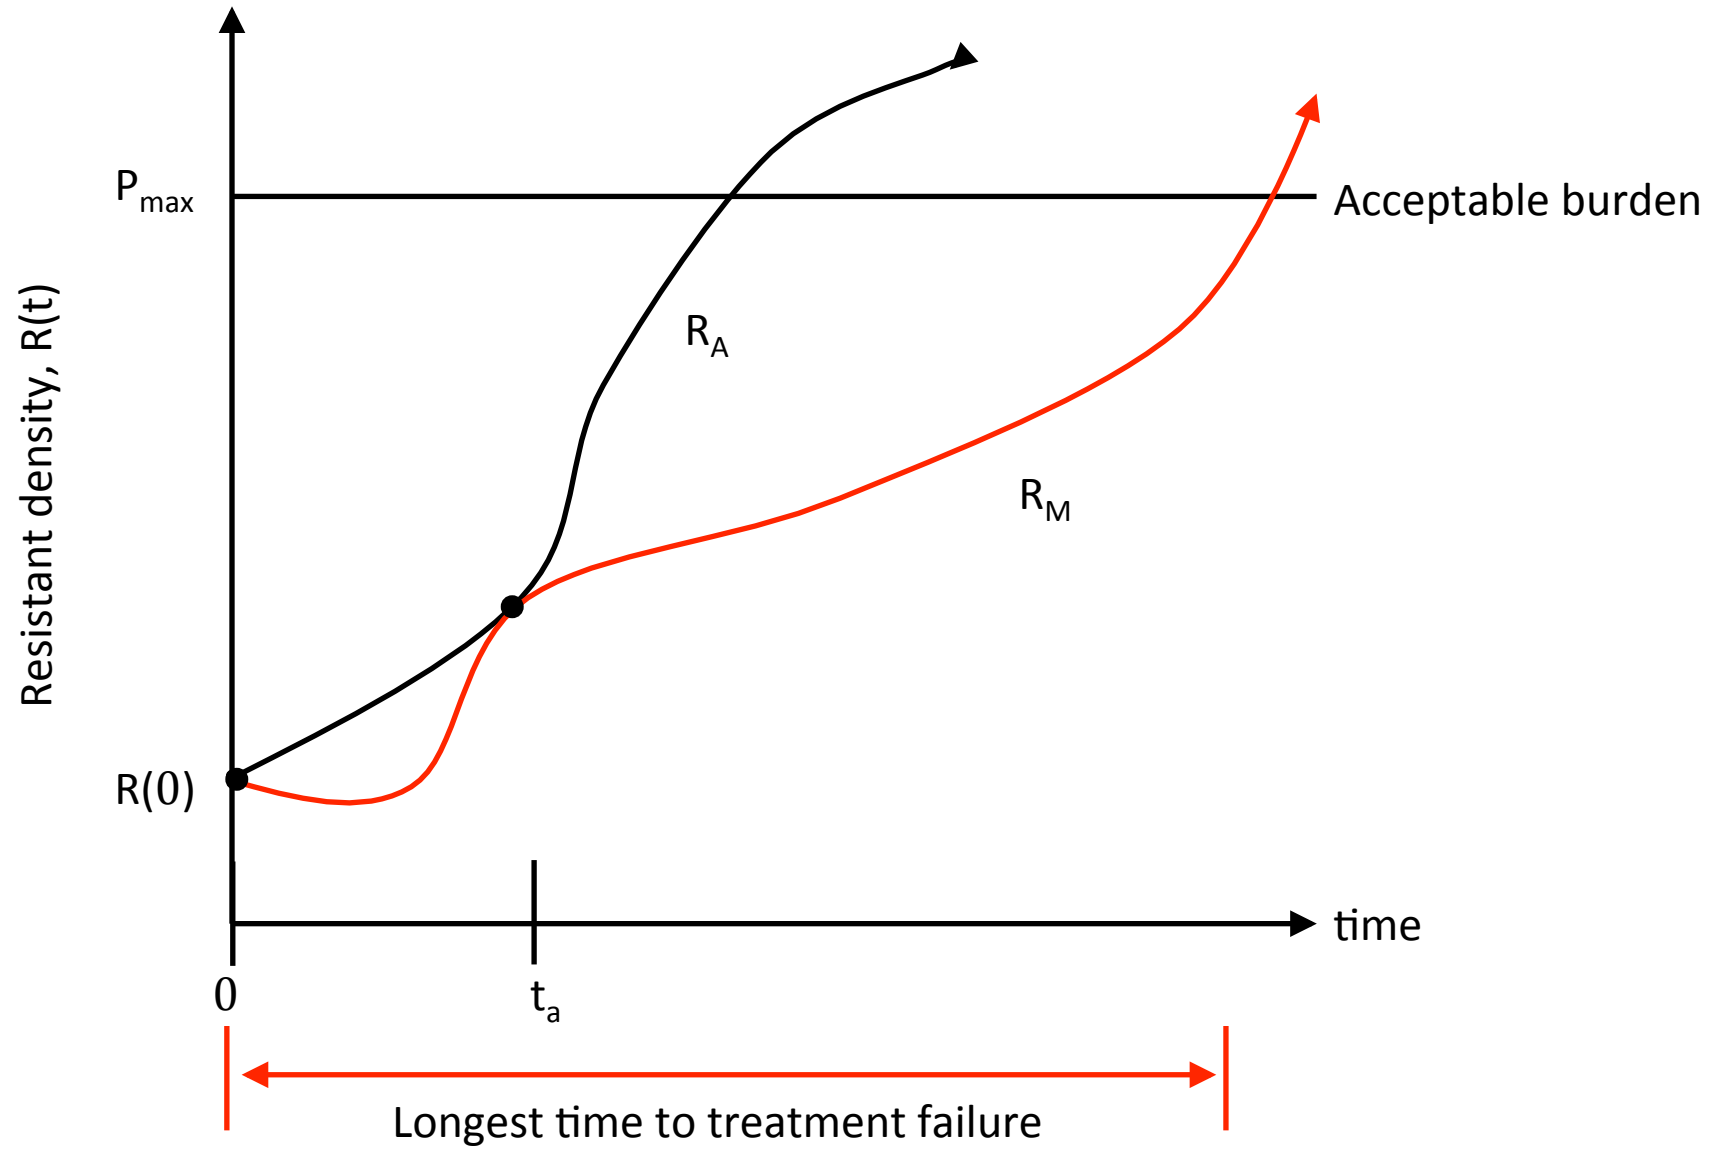

Supplement: pbio.2001110.s005.pdf [file pbio.2001110.s005.pdf]
