# Supplementary material for: How to Use a Chemotherapeutic Agent When Resistance to It Threatens the Patient
Source: PLOS journal article supplement (doi:10.1371/journal.pbio.2001110), 2017-02-09
Supplement: S1 (10.1371/journal.pbio.2001110.s001) [file journal.pbio.2001110.s001]

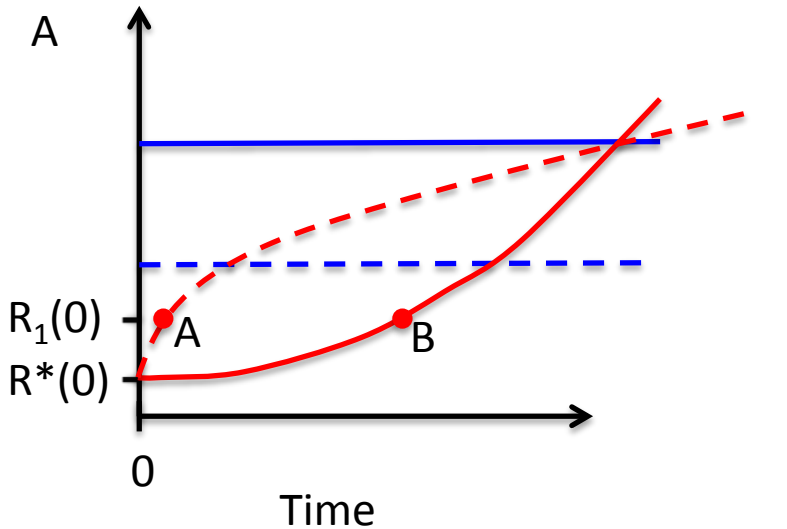

— Acceptable burden  
 - - - Balance threshold

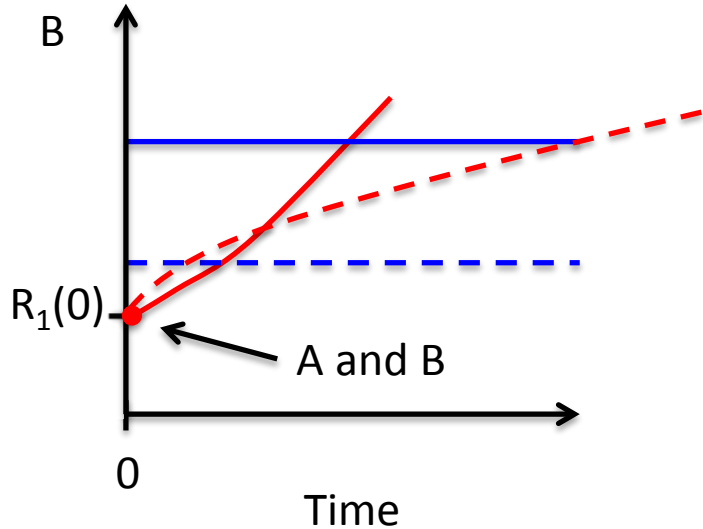

— Aggressive Treatment  
 - - - Containment
