# Supplementary material for: How to Use a Chemotherapeutic Agent When Resistance to It Threatens the Patient
Source: PLOS journal article supplement (doi:10.1371/journal.pbio.2001110), 2017-02-09
Supplement: S7 (10.1371/journal.pbio.2001110.s007) [file journal.pbio.2001110.s007]

Equation (1) from the main text is a standard logistic equation with a (possibly time-varying) carrying capacity. To see this note that,

$$\begin{aligned}\dot{R}(t) &= rR(t)(1 - \delta R(t)) - \mu(t)R(t), \\ &= (r - \mu(t))R(t)\left(1 - \frac{\delta r}{r - \mu(t)}R\right),\end{aligned}$$

and so the carrying capacity is  $R_{Carry} = \frac{r - \mu(t)}{r\delta}$ . If drug-resistance carries a fitness cost then the carrying capacity becomes

$$R_{Carry} = \frac{(1 - c_I)r - \mu(t)}{(1 - c_I)r(1 + c_C)\delta} = \frac{1}{(1 + c_C)\delta} \left(1 - \frac{\mu(t)}{(1 - c_I)r}\right)$$

where drug resistance reduces a pathogens intrinsic replication rate by a factor  $(1 - c_I)$  and increases its sensitivity to competition by a factor  $(1 + c_C)$ . Finally note that if immunity is constant then this carrying capacity is constant and becomes the self-limiting density described in the ‘‘Clinical gains’’ section of the main text

$$R_{lim} = \frac{1}{(1 + c_C)\delta} \left(1 - \frac{\mu}{(1 - c_I)r}\right).$$
